# Supplementary material
Source: PubMed Central journal article supplement (PMC3263512)
Supplement: NIHMS348735-supplement-Supplementary_digital_content_1.pdf [file NIHMS348735-supplement-Supplementary_digital_content_1.pdf]

## Supplemental Digital Content 1

Table 1. Epitope prediction for HLA-DRB1\*0101

| Rank | Position | Score* |
|------|----------|--------|
| 1    | 427      | 39     |
| 2    | 234      | 30     |
| 3    | 359      | 29     |
| 4    | 80       | 28     |
| 5    | 487      | 28     |
| 6    | 597      | 28     |
| 7    | 238      | 27     |
| 8    | 339      | 27     |
| 9    | 395      | 27     |
| 10   | 397      | 27     |

SYFPEITHI algorithm (<http://www.syfpeithi.de/>)

\* The top 10 ranked epitopes are listed in the table
